# Supplementary material
Source: PubMed Central journal article supplement (PMC3049520)
Supplement: jcbfm2010142x2.pdf [file jcbfm2010142x2.pdf]

# Scatter Plots of Intracranial Pressure vs Fluid Recovery

## Crystalloid Solution Perfusate

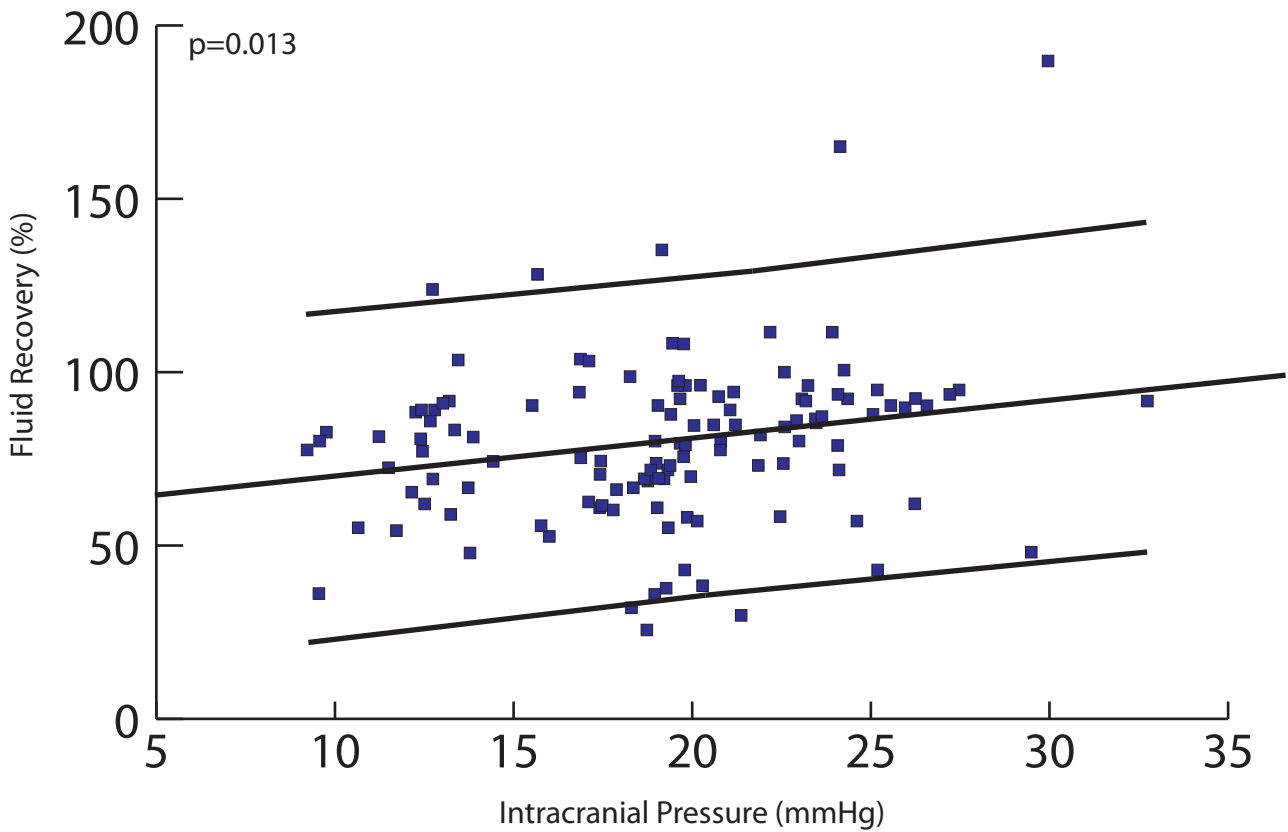

## 3.5% Human Albumin Solution Perfusate

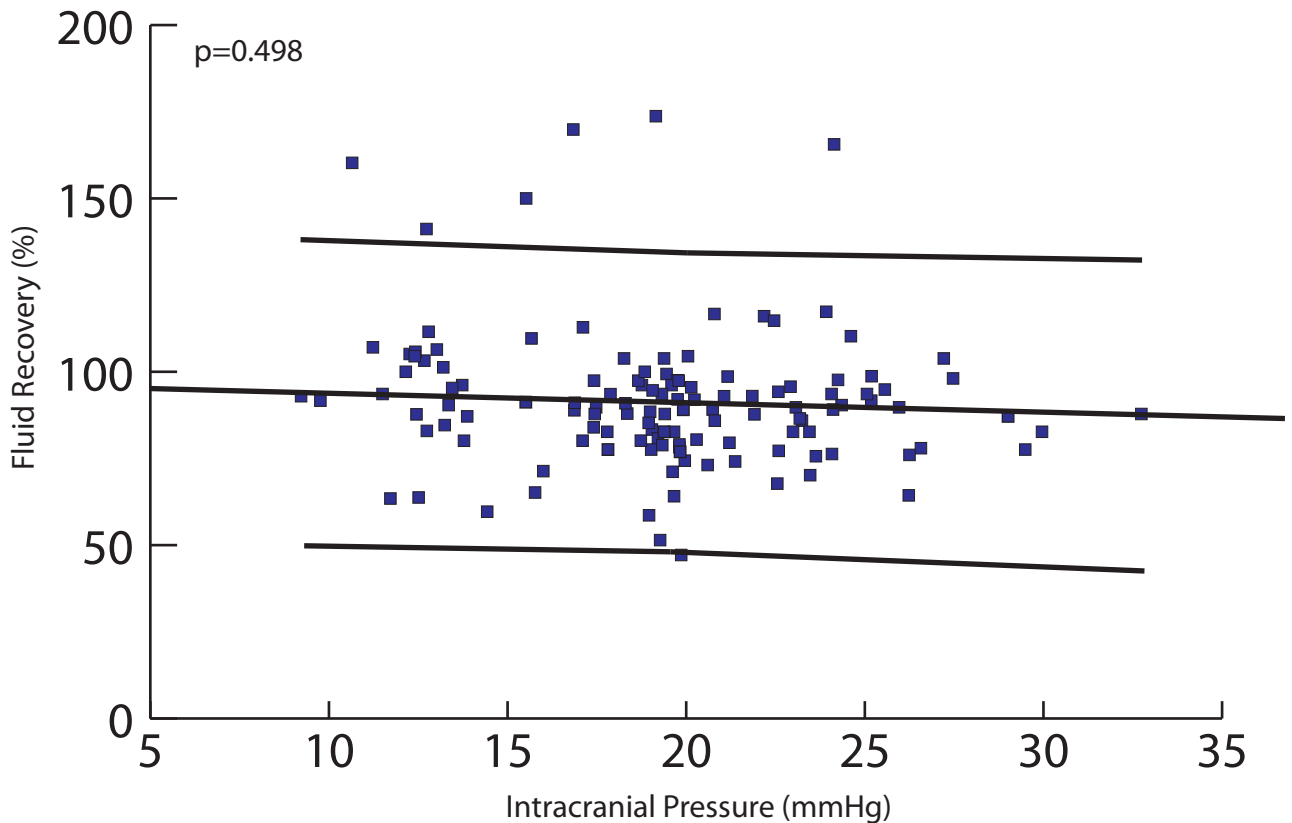

### Supplementary Figure 2: Scatter Plots of Intracranial Pressure vs Fluid Recovery

The two scattergrams plot ICP against FR for the two perfusates employed. Each square is an individual vial's FR plotted against the mean ICP over the time the vial was collecting fluid. A linear regression line is plotted with 95% confidence intervals. The p-value is derived from an ANOVA.
