# Supplementary material
Source: PubMed Central journal article supplement (PMC3049520)
Supplement: jcbfm2010142x3.pdf [file jcbfm2010142x3.pdf]

Figure 3.1: Microdialysate Recovered Cytokine

Crystalloid Perfusate

3.5% HAS

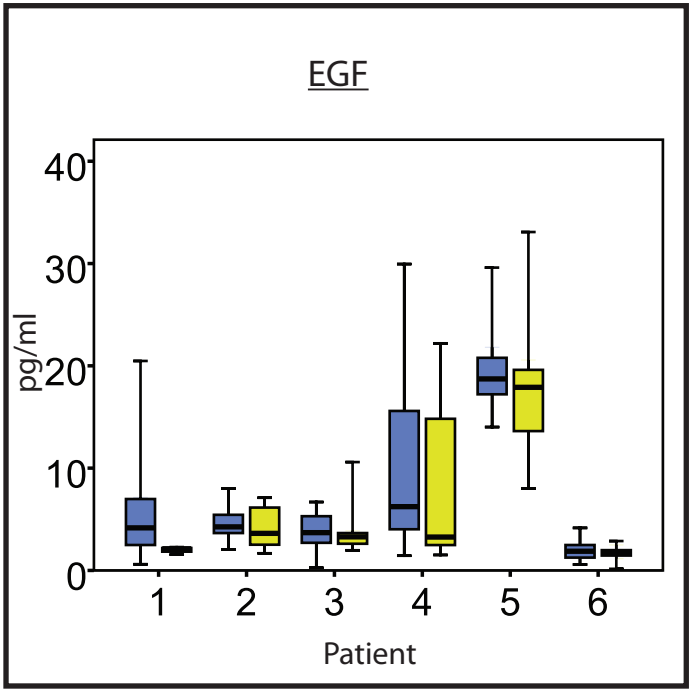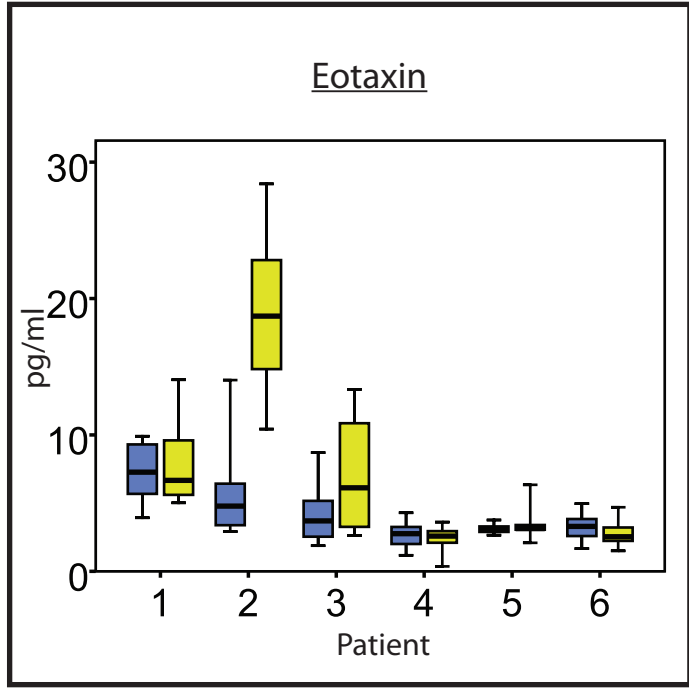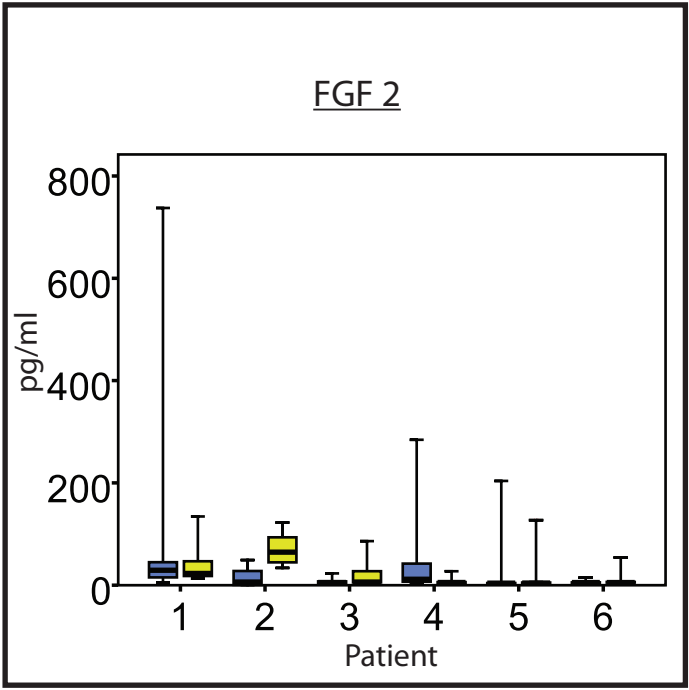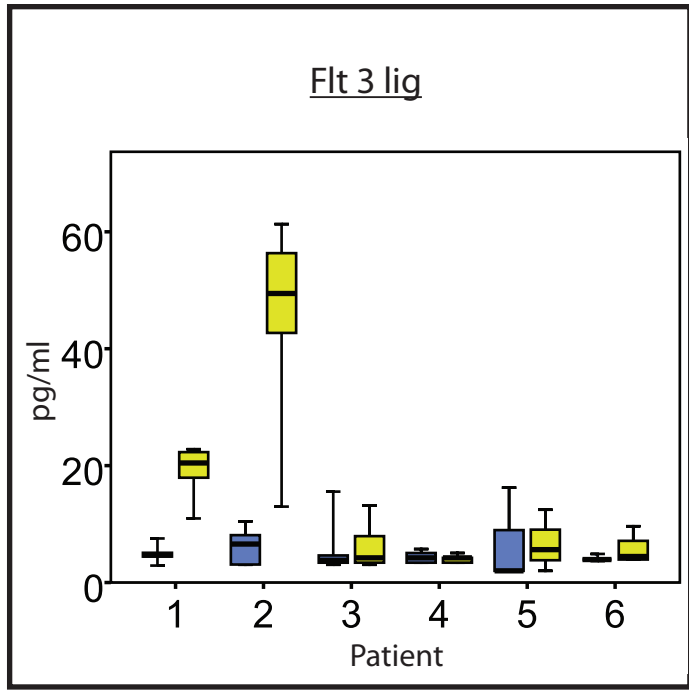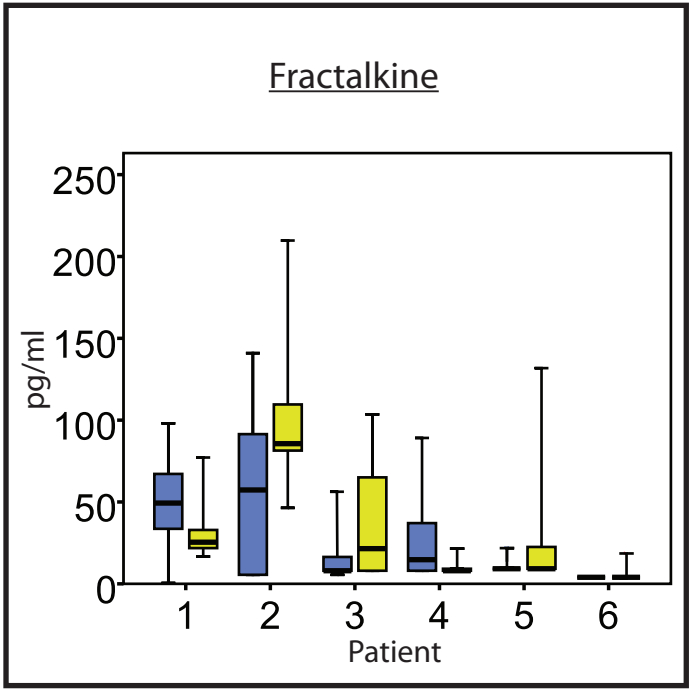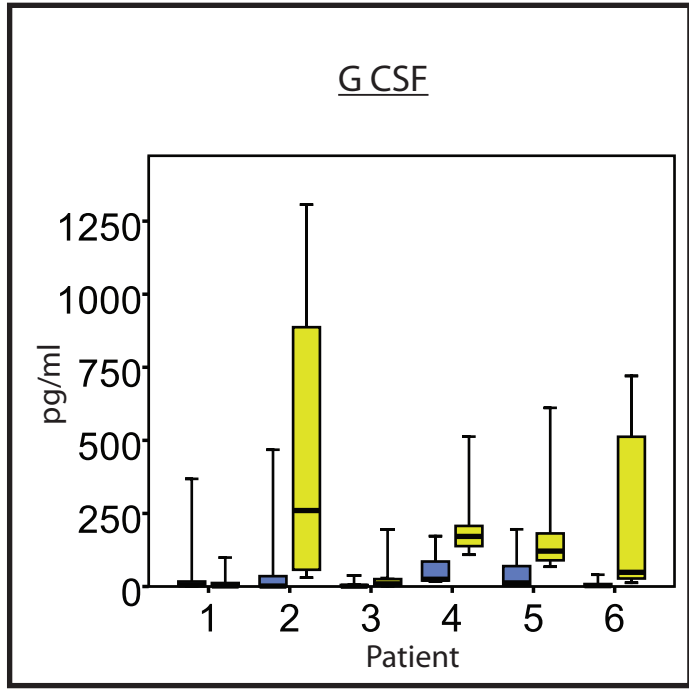

Figure 3.2

Crytalloid Perfusate 3.5% HAS

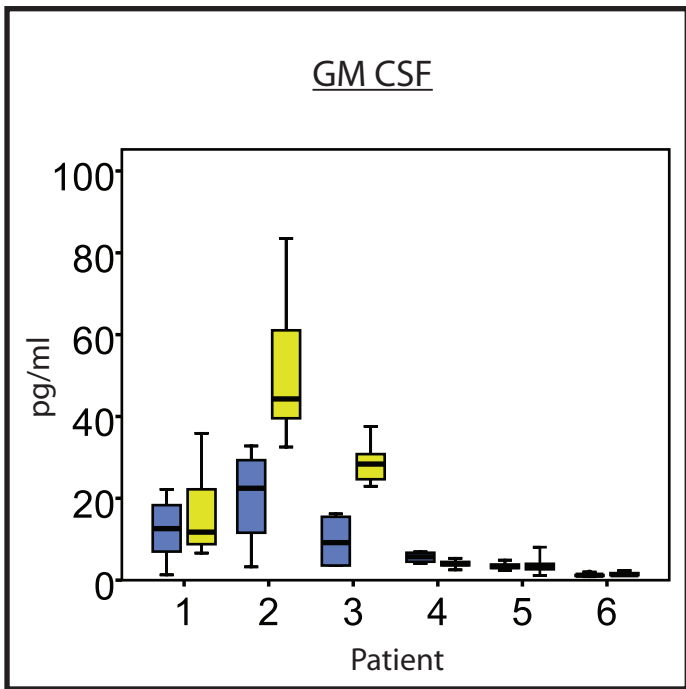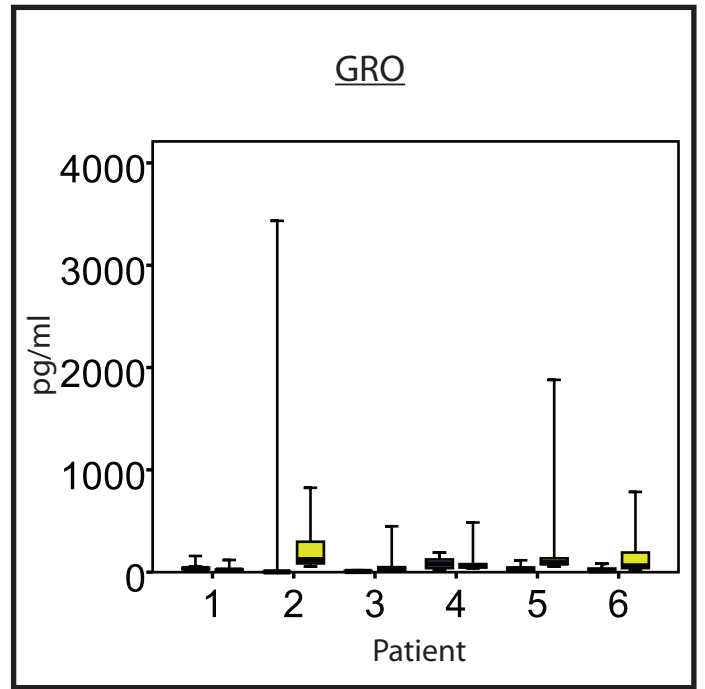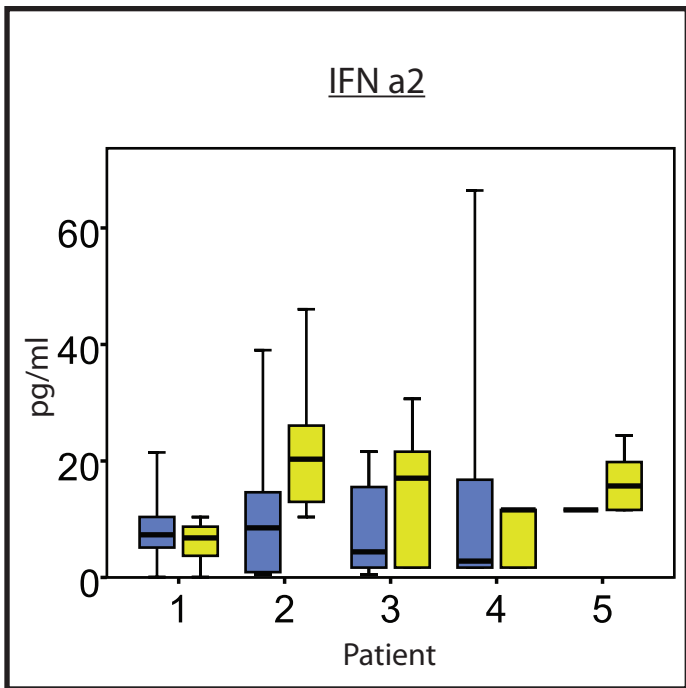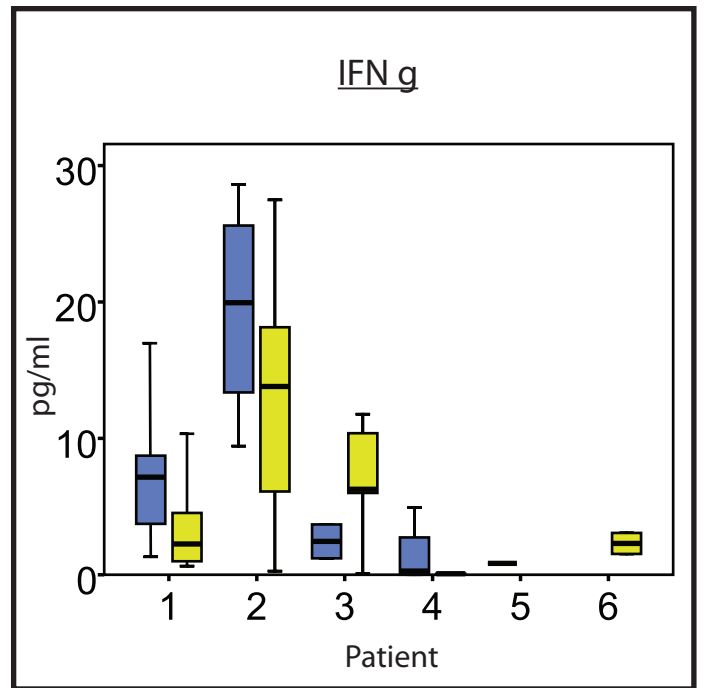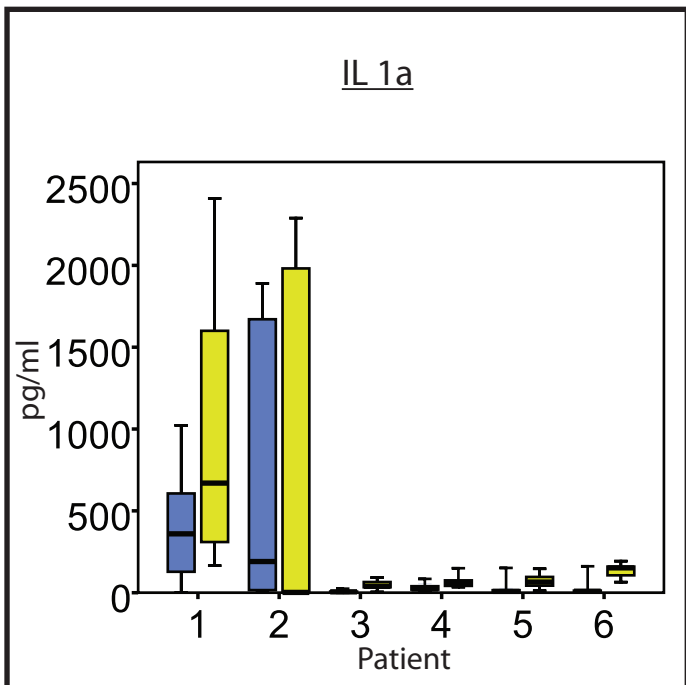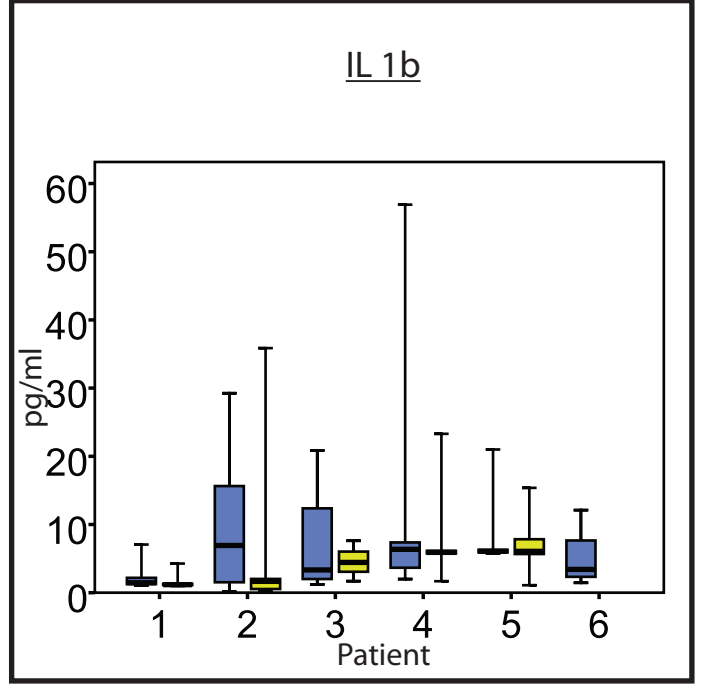

Figure 3.3

Crystalloid Perfusate 3.5% HAS

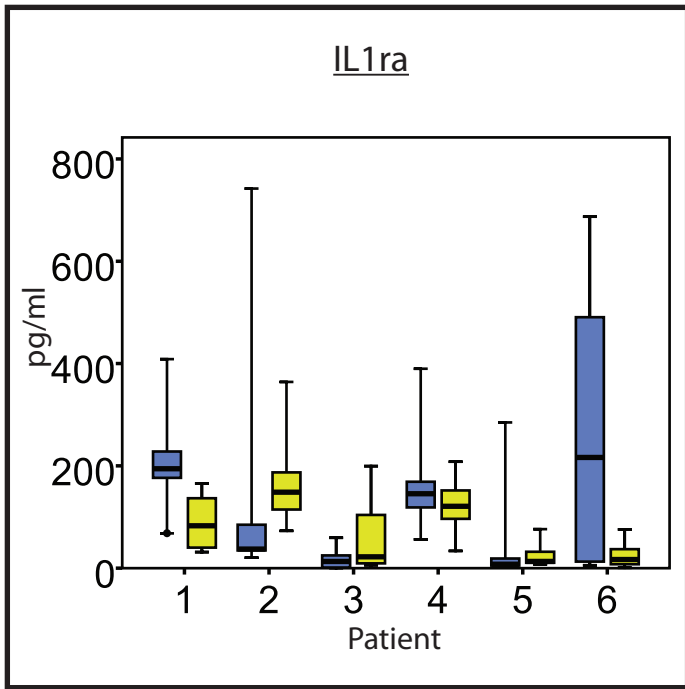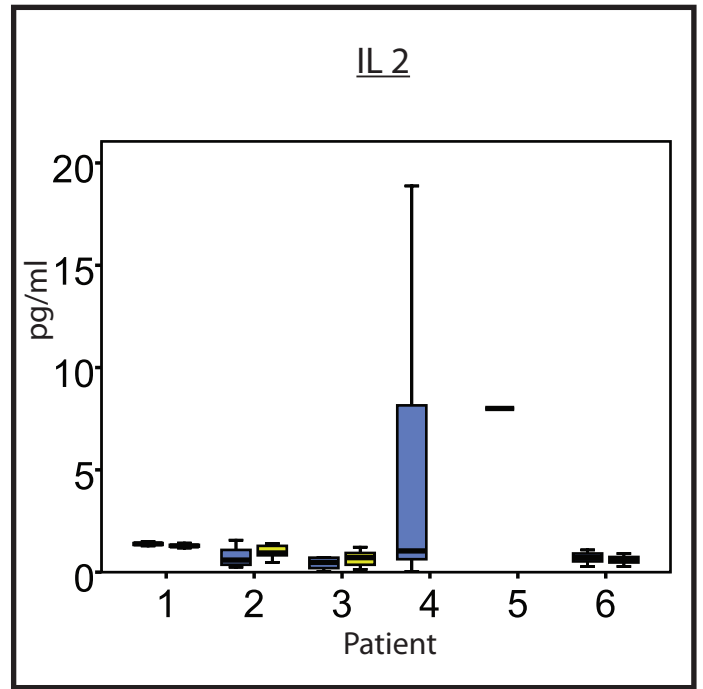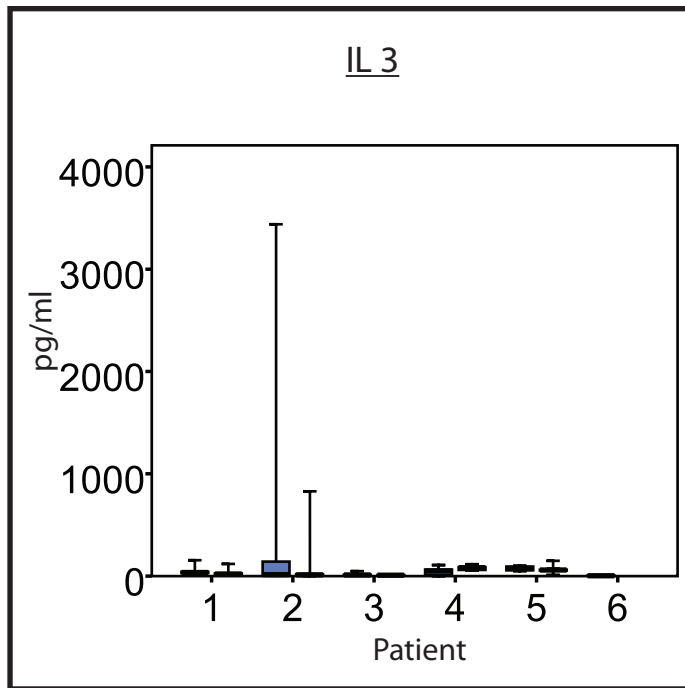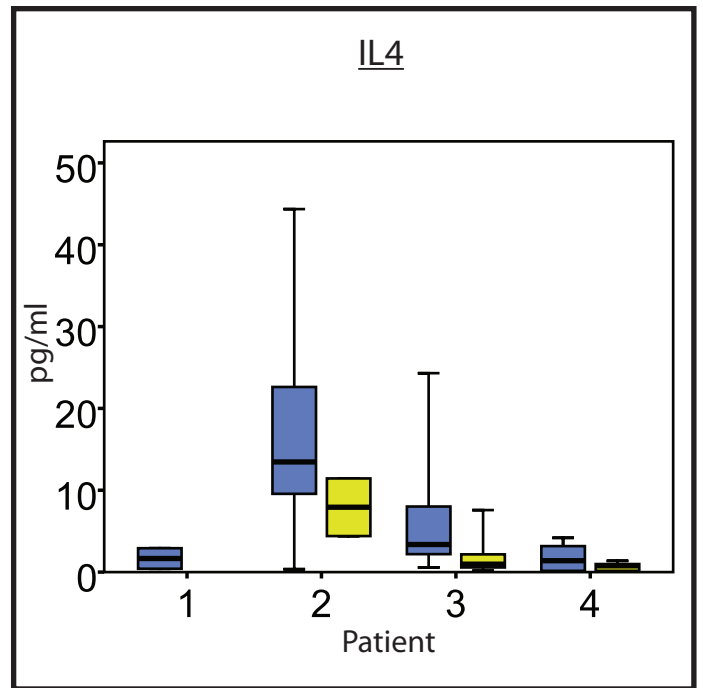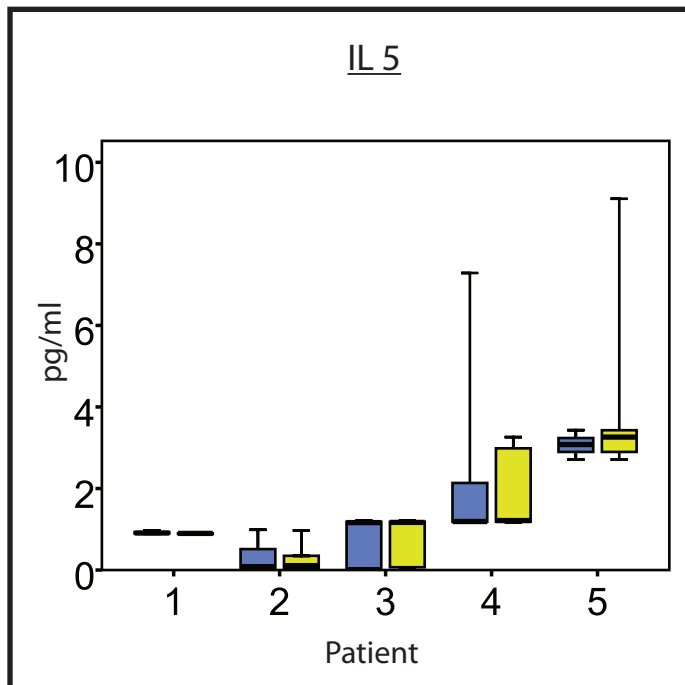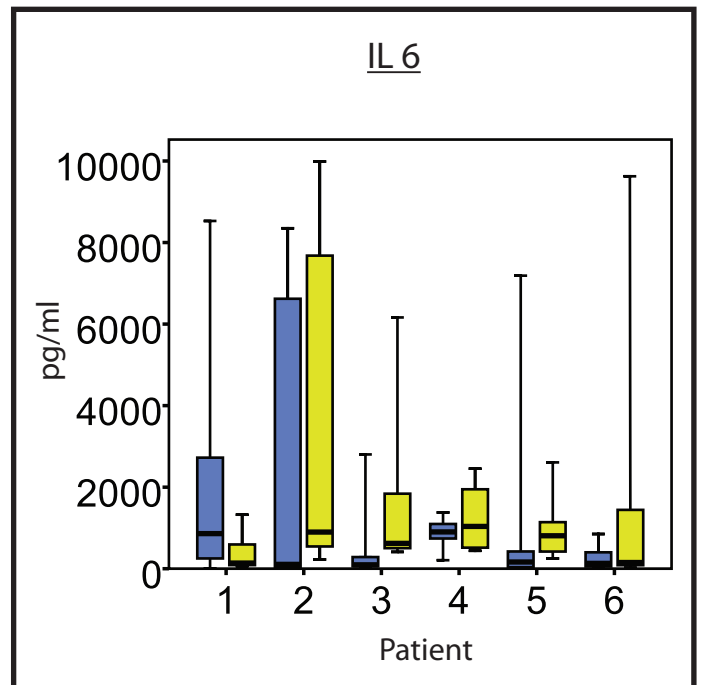

Figure 3.4

Crystalloid Perfusate 3.5% HAS

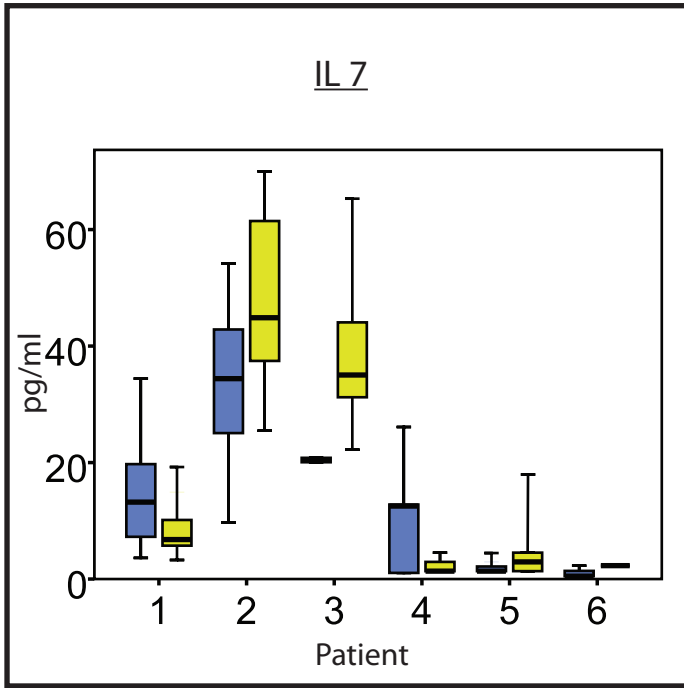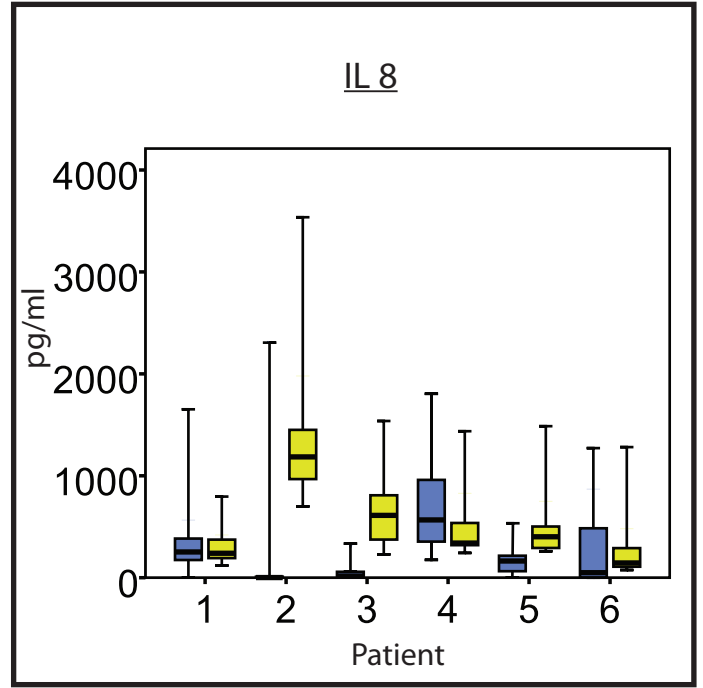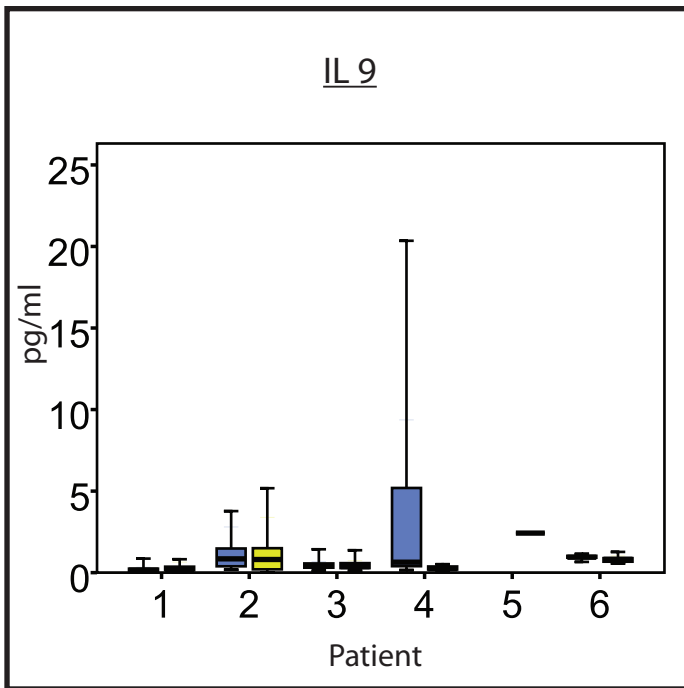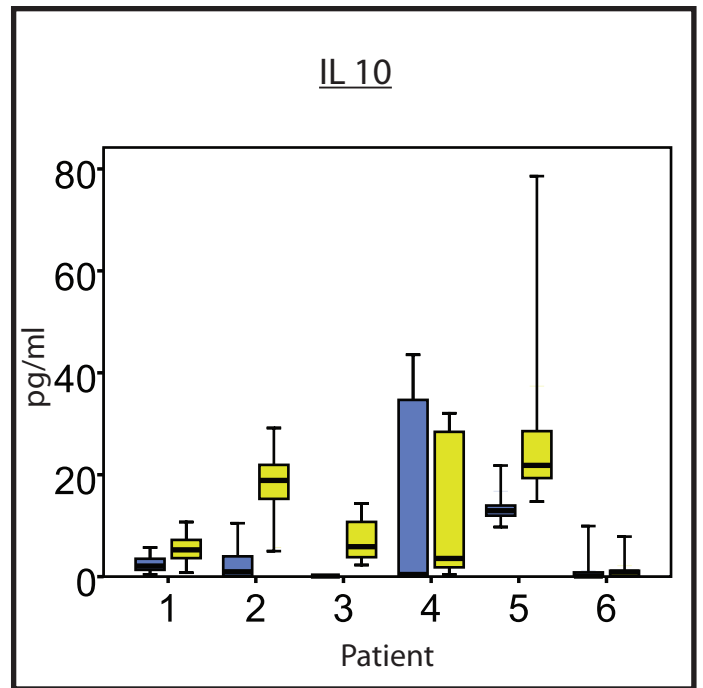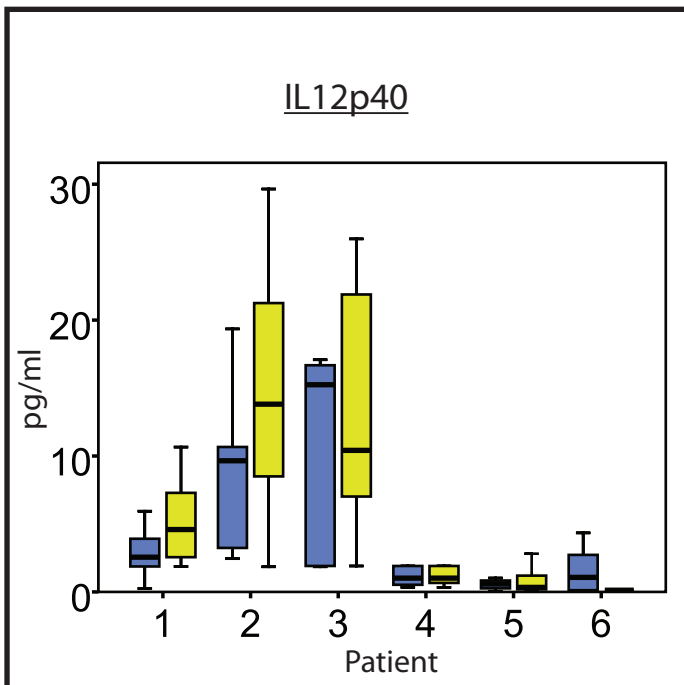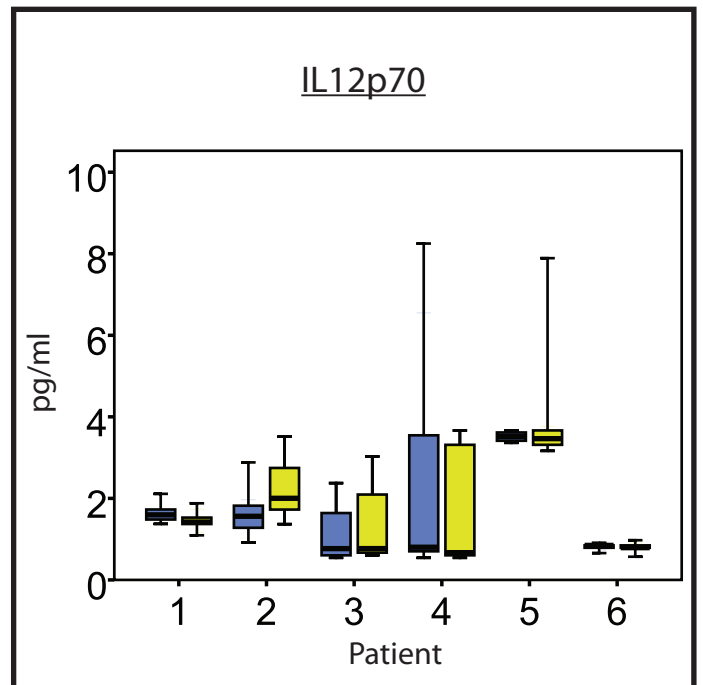

Figure 3.5

Crystalloid Perfusate 3.5% HAS

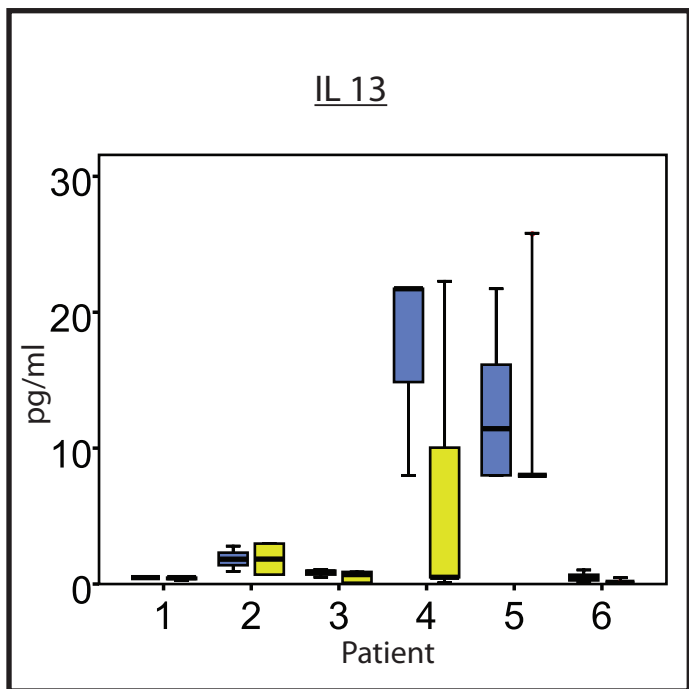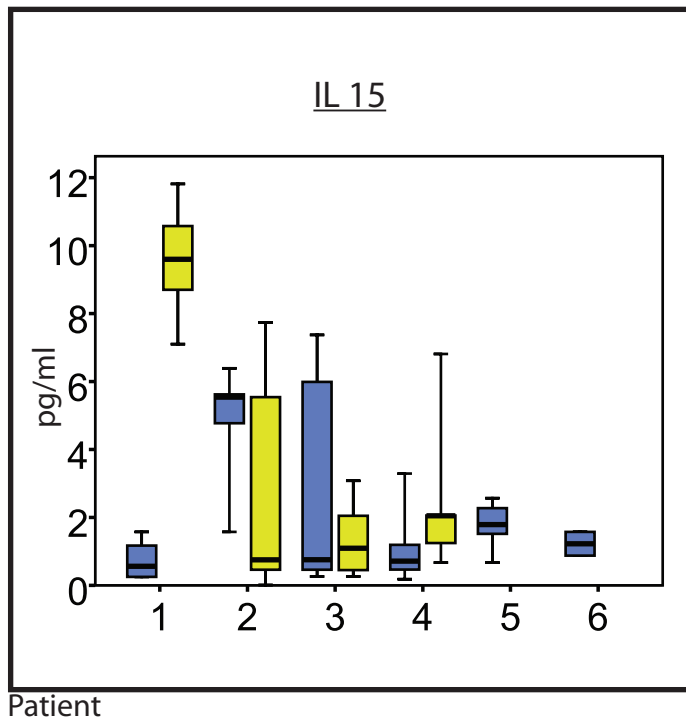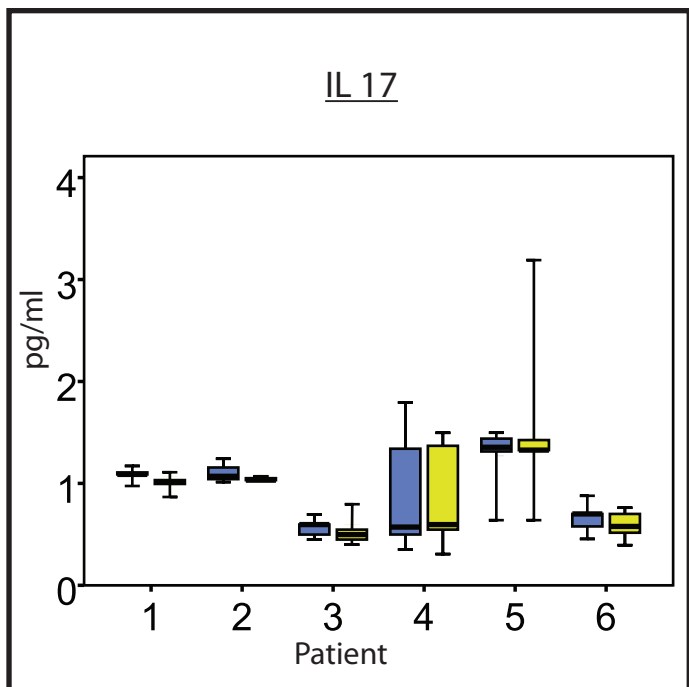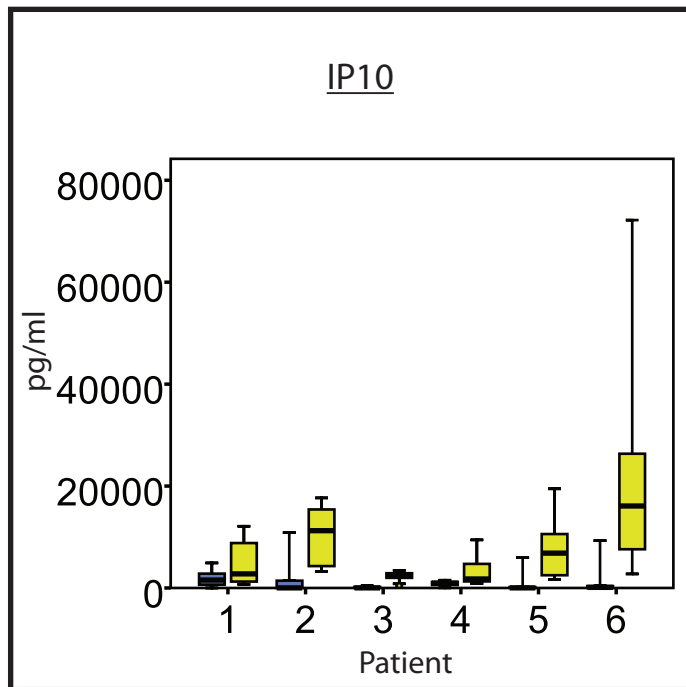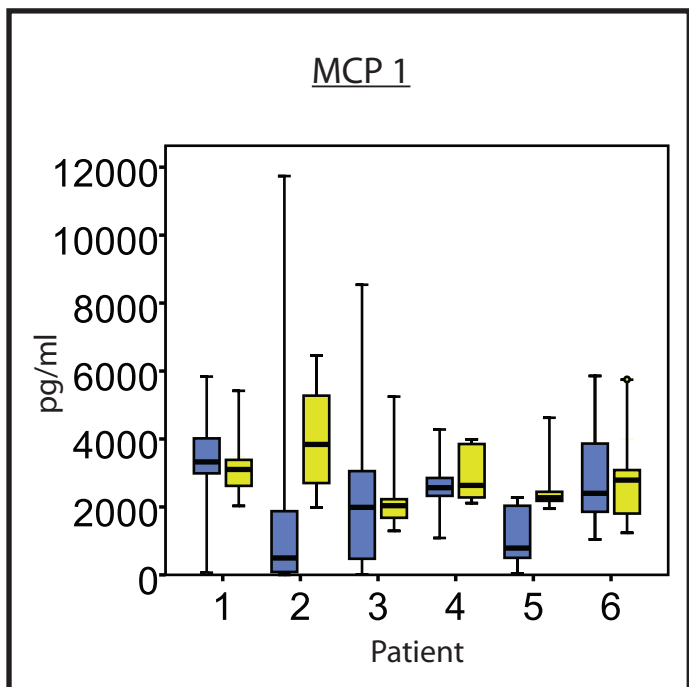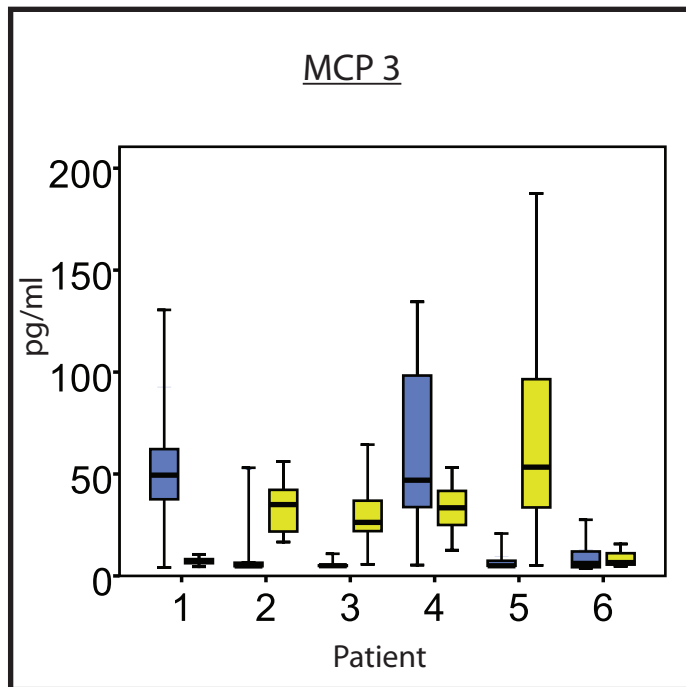

Figure 3.6

Crystalloid Perfusate 3.5% HAS

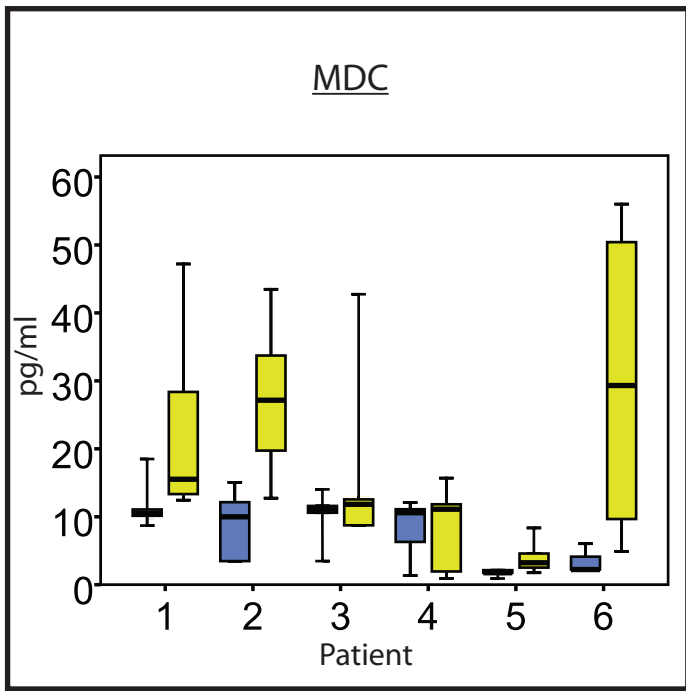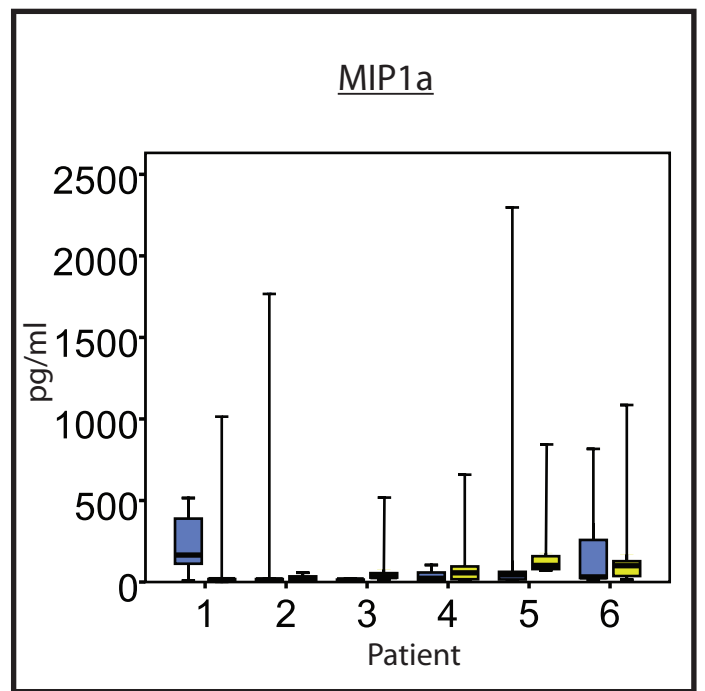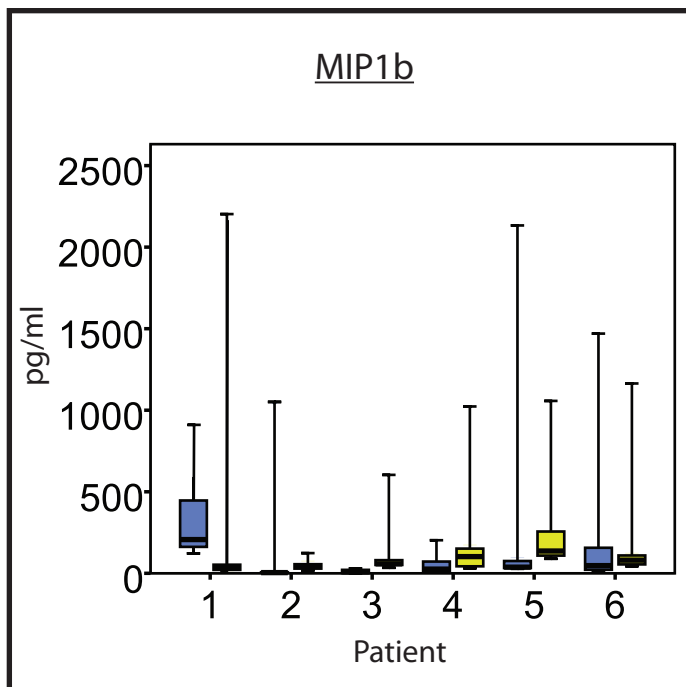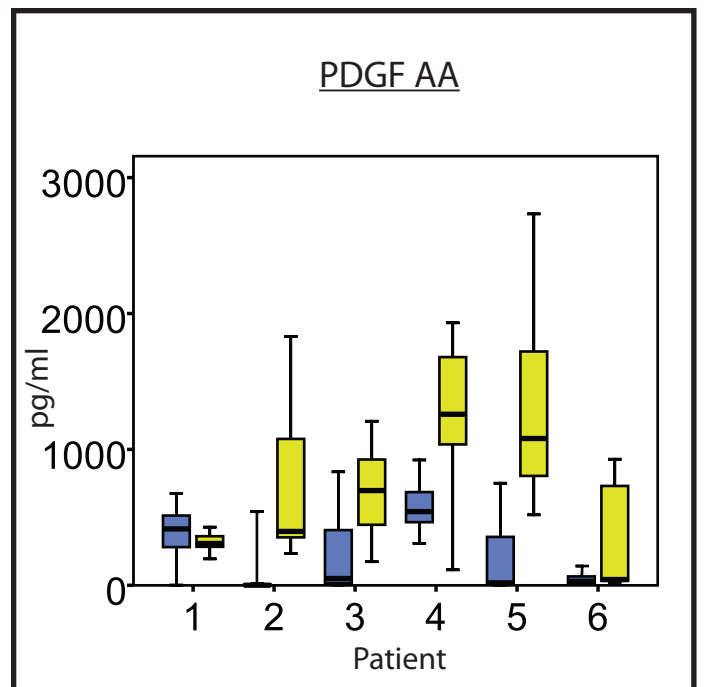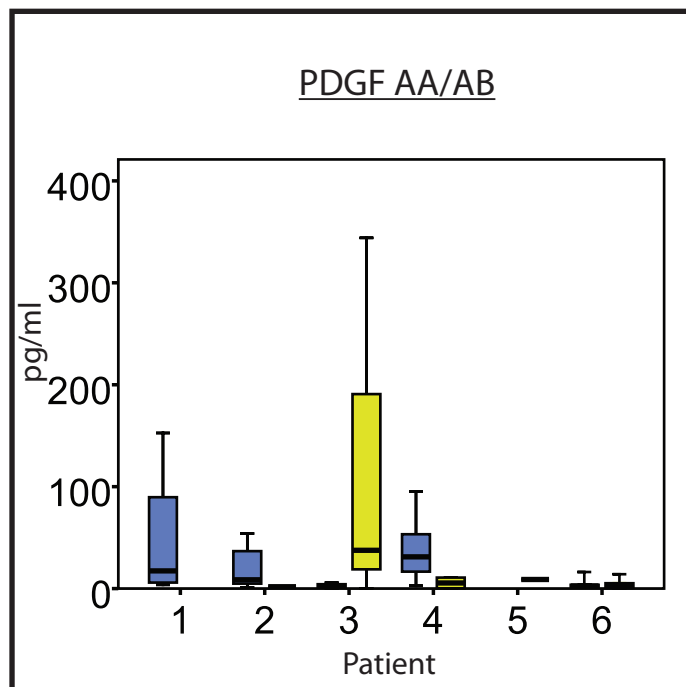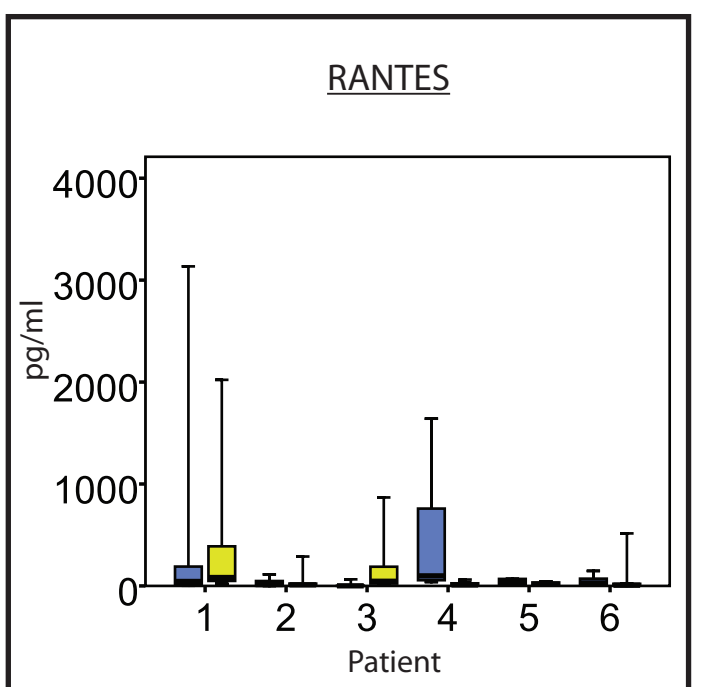

Figure 3.7

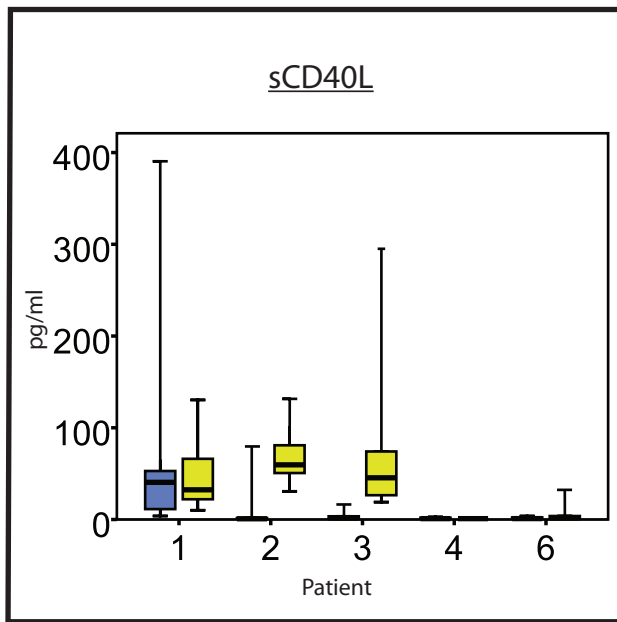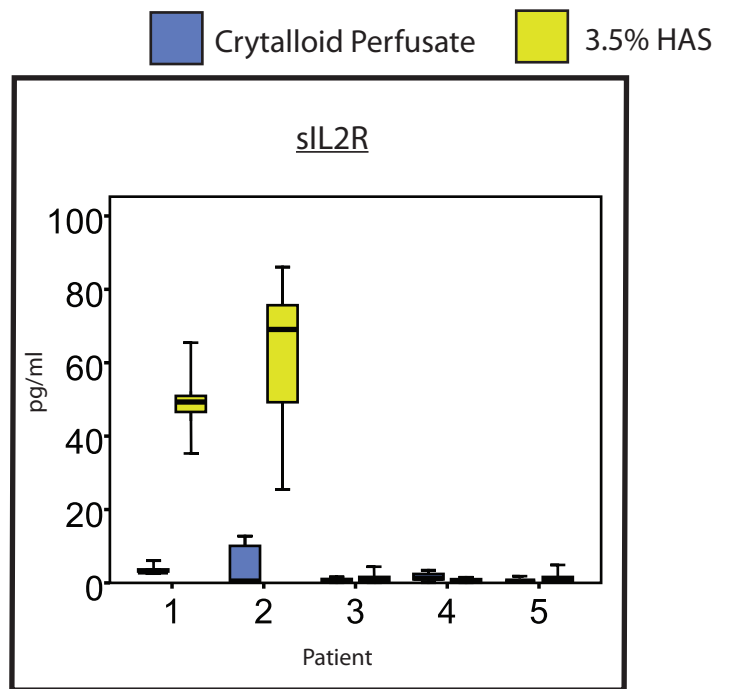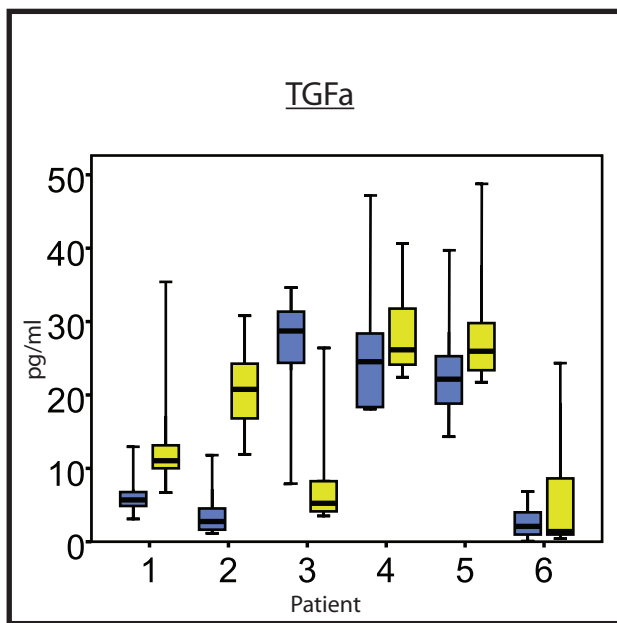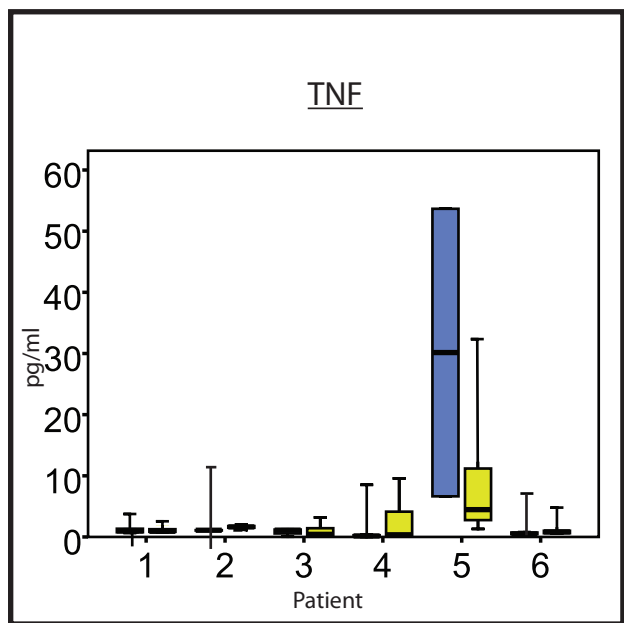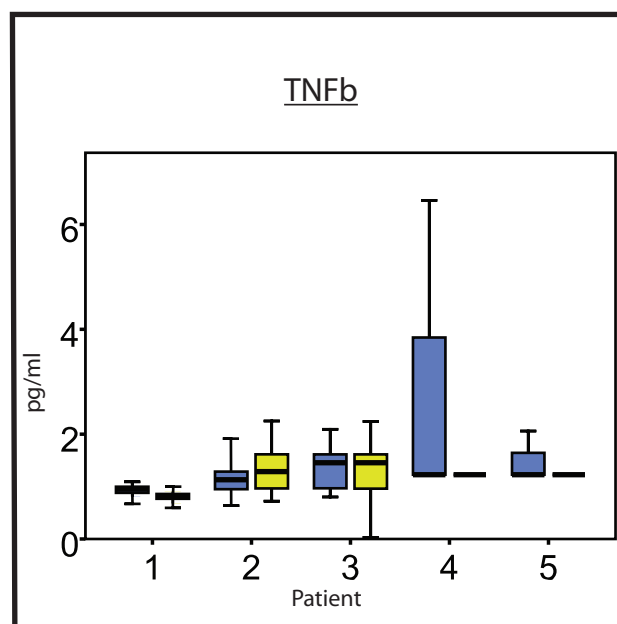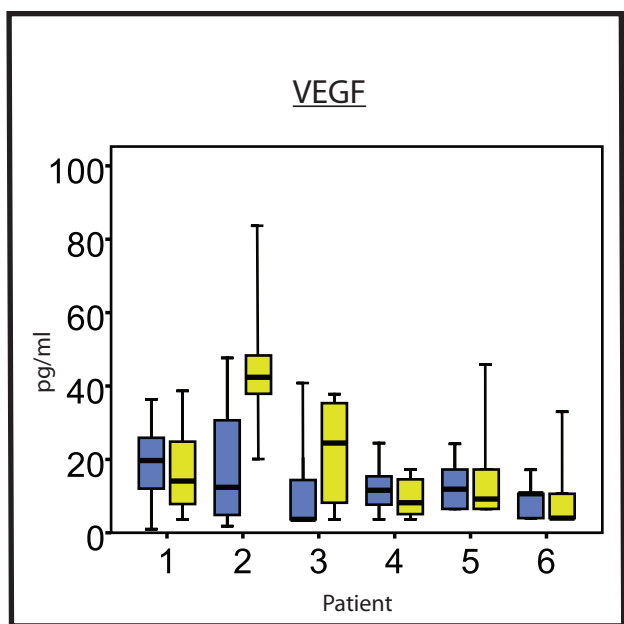

**Supplementary Figures 3.1-3.7**

The full microdialysis data set from the first 6 patients is summarised in box and whisker plots broken down by patient and microdialysis catheter perfusate. The boxes plot median and inter-quartile ranges. The whiskers plot the entire range. The extreme values may represent genuine changes in cytokine concentrations rather than being outliers. The figure demonstrates both the large variation in concentration within each individual patient as well as the variation between patients. In a few cases, no quantifiable cytokine could be determined for a given cytokine in a given patient, in which case the box and whisker is omitted.
