# Supplementary material
Source: PubMed Central journal article supplement (PMC3049520)
Supplement: jcbfm2010142x4.pdf [file jcbfm2010142x4.pdf]

## Estimation of 3.5% HAS perfusate RR based on previous *in vitro* data

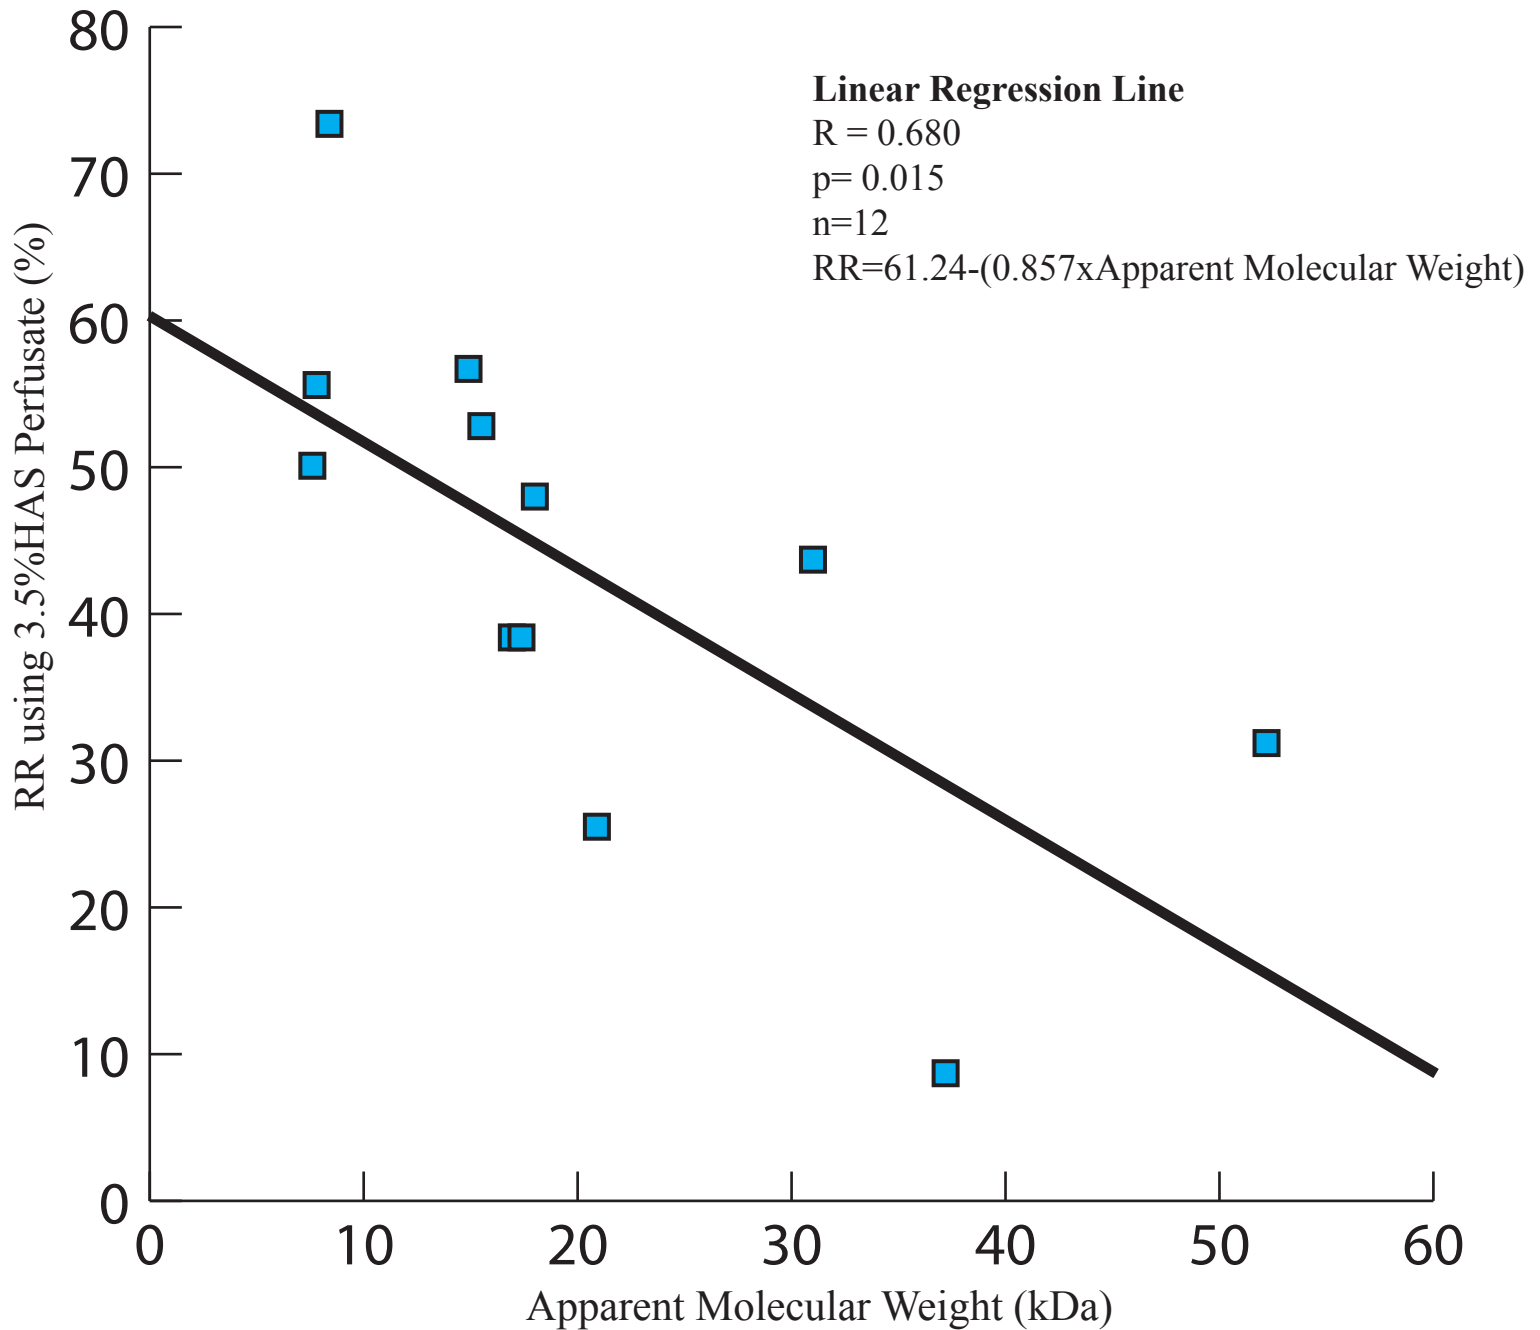

### Supplementary Figure 4: Estimation of RR based on previous *in vitro* data

The scatter plot is derived from empirical *in vitro* data from Figure 6, Helmy et al, 2009. RR was determined for a panel of 12 cytokines (IL1a, IL1b, IL1ra, IL2, IL4, IL6, IL8, IL10, IL17, TNF, MIPa1, MIP1b). Apparent molecular weight is the molecular weight of each cytokine taking into account any dimerisation/trimerisation. The linear regression line has been used to estimate RR for those cytokines where no *in vitro* data exists. The p-value derives from an ANOVA. The apparent molecular weights (kDa) for the additional cytokines, where no *in vitro* recovery data are available, are reproduced below. The estimated RR values are shown in table 4 in the manuscript.

| Cytokine    | Cytokine | Cytokine | Cytokine | Cytokine  |               |
|-------------|----------|----------|----------|-----------|---------------|
| EGF         | 6.2      | IL3      | 15.0     | MCP3      | 9.0           |
| Eotaxin     | 8.3      | IL5      | 26.0     | MDC       | 8.0           |
| FGF2        | 17.2     | IL7      | 17.4     | PDGFAA    | 28.5          |
| Flt3lig     | 17.6     | IL9      | 14.0     | PDGFAB/BB | 24.9          |
| Fractalkine | 8.5      | IL12p40  | 40.0     | RANTES    | 7.8           |
| GCSF        | 18.7     | IL12p70  | 70.0     | sCD40L    | 18.0          |
| GMCSF       | 14.6     | IL13     | 12.5     | sIL2R     | 31.0          |
| GRO         | 7.8      | IL15     | 14.0     | TGFa      | 5.5           |
| IFNa2       | 19.2     | IP10     | 8.5      | TNFb      | 55.8 (trimer) |
| IFNg        | 16.7     | MCP1     | 8.6      | VEGF      | 66.6          |
