# Supplementary material
Source: PubMed Central journal article supplement (PMC3049520)
Supplement: jcbfm2010142x5.pdf [file jcbfm2010142x5.pdf]

**Supplementary Table 1: Cytokines assayed**

| <b>Cytokine</b>                                             | <b>Abbreviation</b> | <b>Alternative Nomenclature</b>      |
|-------------------------------------------------------------|---------------------|--------------------------------------|
| <b>Epidermal Growth Factor</b>                              | EGF                 | HMGF, PGF                            |
| <b>Eotaxin</b>                                              | Eotaxin             | CCL-11                               |
| <b>Basic Fibroblast Growth Factor</b>                       | FGF2                | bFGF, FGF- $\beta$                   |
| <b>Fms-related tyrosine kinase 3 ligand</b>                 | Flt3 lig            |                                      |
| <b>Fractalkine</b>                                          | Fractalkine         | CX3CL-1                              |
| <b>Granulocyte Colony Stimulating Factor</b>                | G-CSF               |                                      |
| <b>Granulocyte-Monocyte Colony Stimulating Factor</b>       | GM-CSF              |                                      |
| <b>GRO</b>                                                  | GRO                 | CXCL-1                               |
| <b>Interferon <math>\alpha</math>-2</b>                     | IFN $\alpha$ 2      |                                      |
| <b>Interferon <math>\gamma</math></b>                       | IFN $\gamma$        |                                      |
| <b>Interleukin-1 <math>\alpha</math></b>                    | IL1 $\alpha$        | IL-1F1                               |
| <b>Interleukin-1 <math>\beta</math></b>                     | IL1 $\beta$         | IL-1F2                               |
| <b>Interleukin-1 receptor antagonist</b>                    | IL1ra               | IL-1F3                               |
| <b>Interleukin-2</b>                                        | IL2                 | Lymphokine                           |
| <b>Interleukin-3</b>                                        | IL3                 | Multi-colony stimulating factor      |
| <b>Interleukin-4</b>                                        | IL4                 |                                      |
| <b>Interleukin-5</b>                                        | IL5                 |                                      |
| <b>Interleukin-6</b>                                        | IL6                 |                                      |
| <b>Interleukin-7</b>                                        | IL7                 |                                      |
| <b>Interleukin-8</b>                                        | IL8                 | CXCL-8                               |
| <b>Interleukin-9</b>                                        | IL9                 |                                      |
| <b>Interleukin-10</b>                                       | IL10                | Cytokine Synthesis Inhibitory Factor |
| <b>Interleukin 12 subunit <math>\beta</math></b>            | IL12p40             |                                      |
| <b>Interleukin-12</b>                                       | IL12p70             |                                      |
| <b>Interleukin-13</b>                                       | IL13                |                                      |
| <b>Interleukin-15</b>                                       | IL15                |                                      |
| <b>Interleukin-17</b>                                       | IL17                |                                      |
| <b>Chemokine (C-X-C motif) ligand 10</b>                    | IP10                | CXCL-10                              |
| <b>Monocyte Chemotactic Protein 1</b>                       | MCP1                | CCL-2                                |
| <b>Monocyte Chemotactic Protein3</b>                        | MCP3                | CCL-7                                |
| <b>Macrophage Derived Chemoattractant</b>                   | MDC                 | CCL-22                               |
| <b>Macrophage Inflammatory Protein-1<math>\alpha</math></b> | MIP1 $\alpha$       | CCL-3                                |
| <b>Macrophage Inflammatory Protein-1<math>\beta</math></b>  | MIP1 $\beta$        | CCL-4                                |
| <b>Platelet Derived Growth Factor AA</b>                    | PDGF-AA             |                                      |
| <b>Platelet Derived Growth Factor AB/BB</b>                 | PDGF-AAAB           |                                      |
| <b>RANTES</b>                                               | RANTES              | CCL-5                                |
| <b>Soluble CD40 Ligand</b>                                  | sCD40L              | CD154                                |
| <b>Soluble Interleuking-2 Receptor</b>                      | sIL2R               |                                      |
| <b>Transforming Growth Factor <math>\alpha</math></b>       | TGF $\alpha$        |                                      |
| <b>Tumour Necrosis Factor <math>\alpha</math></b>           | TNF                 | Cachexin                             |
| <b>Tumour Necrosis Factor <math>\beta</math></b>            | TNF $\beta$         | Lymphotoxin                          |
| <b>Vascular Endothelial Growth Factor</b>                   | VEGF                |                                      |

**Supplementary Table 2: Patient Demographics and Mechanism of Injury**

| <b>Patient</b> | <b>Age</b> | <b>Sex</b> | <b>Mechanism of Injury</b> | <b>Post-resuscitation GCS</b> | <b>Pattern of Injury</b>         | <b>Time elapsed between injury and monitoring (hours)</b> |
|----------------|------------|------------|----------------------------|-------------------------------|----------------------------------|-----------------------------------------------------------|
| <b>1</b>       | 28         | M          | Fall down stairs           | E1 V1 M2                      | Diffuse                          | 64                                                        |
| <b>2</b>       | 28         | M          | RTA                        | E2 V1 M5                      | Diffuse                          | 24                                                        |
| <b>3</b>       | 26         | M          | RTA                        | E2 V1 M4                      | Diffuse                          | 29                                                        |
| <b>4</b>       | 35         | M          | Assault                    | E1 V1 M4                      | Diffuse (and evacuated subdural) | 61                                                        |
| <b>5</b>       | 52         | F          | RTA                        | E1 V1 M5                      | Diffuse                          | 22                                                        |
| <b>6</b>       | 18         | F          | RTA                        | E1 V1 M1                      | Diffuse                          | 22                                                        |
| <b>7</b>       | 44         | F          | RTA                        | E1 V1 M1                      | Diffuse                          | 96                                                        |
| <b>8</b>       | 25         | M          | RTA                        | E1 V1 M1                      | Diffuse                          | 20                                                        |
| <b>9</b>       | 27         | F          | RTA                        | E1 V1 M1                      | Diffuse                          | 24                                                        |
| <b>10</b>      | 25         | F          | RTA                        | E1 V1 M2                      | Diffuse                          | 28                                                        |
| <b>11</b>      | 58         | F          | RTA                        | E1 V1 M1                      | Diffuse                          | 24                                                        |
| <b>12</b>      | 61         | F          | RTA                        | E1 V1 M1                      | Diffuse                          | 20                                                        |

**GCS – Glasgow Coma Scale (3 minimum to 15 maximum)**

**E – Eye Opening Score (1 to 4)**

**V – Verbal Score (1 to 5)**

**M – Motor Score (1 to 6)**

**Supplementary Table 3: Peak Time Points in Relation to Time of Injury**

| Cytokine                       | Timing of Peak Timepoint (hours following injury) in each Patient |     |     |     |     |     |     |     |     |     |     |     |
|--------------------------------|-------------------------------------------------------------------|-----|-----|-----|-----|-----|-----|-----|-----|-----|-----|-----|
|                                | 1                                                                 | 2   | 3   | 4   | 5   | 6   | 7   | 8   | 9   | 10  | 11  | 12  |
| <b>EGF</b>                     |                                                                   |     |     | 102 |     |     |     |     |     |     | 96  |     |
| <b>FGF2</b>                    | <60                                                               |     | <30 | <60 |     |     | 156 |     |     |     | 126 |     |
| <b>Flt-3 lig</b>               |                                                                   |     |     |     |     |     | 142 |     |     |     | 126 |     |
| <b>Fractalkine</b>             |                                                                   |     | 36  | 30  |     |     |     |     |     | 76  | 126 |     |
| <b>G-CSF</b>                   | <60                                                               | 60  | 36  | <60 | 30  | 30  |     | 68  | <24 | 64  | 60  | 32  |
| <b>GM-CSF</b>                  | 72                                                                |     |     |     |     |     |     |     |     |     |     |     |
| <b>GRO</b>                     | <60                                                               | <24 | <30 | <60 | 30  | <24 |     | 38  | <24 | 40  | 126 | 40  |
| <b>IFN<math>\alpha</math>2</b> | 66                                                                |     |     |     |     |     | 166 |     | <24 |     |     |     |
| <b>IFN<math>\gamma</math></b>  | 66                                                                |     |     |     |     |     | 166 |     | <24 |     | 144 |     |
| <b>IL1<math>\alpha</math></b>  | 78                                                                | <24 |     |     |     |     | 142 |     |     |     |     |     |
| <b>IL1<math>\beta</math></b>   | <60                                                               | <24 | <30 |     | <24 |     | 136 | 44  | <24 |     | 138 | <20 |
| <b>IL1ra</b>                   | 66                                                                |     | 36  |     | 30  | 30  |     |     |     | 64  | 144 | 80  |
| <b>IL3</b>                     | <60                                                               | <24 |     |     |     |     |     |     |     |     |     |     |
| <b>IL6</b>                     | <60                                                               | 48  | 36  | 72  | 30  | 30  |     | 50  | 36  | 40  | 66  | 128 |
| <b>IL7</b>                     | <60                                                               |     |     | <60 |     |     |     |     | <24 | <28 | 132 |     |
| <b>IL8</b>                     |                                                                   |     |     |     |     | <24 | 114 | 32  | <24 | <28 | 132 | 104 |
| <b>IL9</b>                     |                                                                   | 90  | 54  |     |     |     |     |     |     |     |     |     |
| <b>IL10</b>                    |                                                                   |     | 108 | 138 |     |     | 138 |     |     |     | 144 | 134 |
| <b>IL12p40</b>                 |                                                                   | 42  |     |     |     |     | 166 |     |     |     |     |     |
| <b>IL12p70</b>                 |                                                                   |     | <30 | 132 |     |     |     |     | 36  | 88  | 126 | 134 |
| <b>IL13</b>                    |                                                                   |     |     | 60  |     |     |     |     |     |     |     |     |
| <b>IL15</b>                    |                                                                   |     | 48  | 138 |     |     |     |     | 36  |     |     |     |
| <b>IL17</b>                    |                                                                   |     |     | 144 |     |     |     |     |     |     |     |     |
| <b>IP10</b>                    | 78                                                                |     |     | 78  |     | 72  | 142 | 52  | 36  | 52  |     | 62  |
| <b>MCP3</b>                    |                                                                   |     |     |     | 42  | 30  | 138 | 124 |     |     |     | 128 |
| <b>MDC</b>                     | <60                                                               |     |     |     |     |     | 166 |     |     |     |     | 134 |
| <b>MIP1<math>\alpha</math></b> | <60                                                               |     | 36  | <60 | 30  |     |     | 32  | 32  |     | 132 | <20 |
| <b>MIP1 <math>\beta</math></b> | <60                                                               |     | <30 | <60 | 30  | 54  |     |     |     |     | 132 | <20 |
| <b>PDGFAA</b>                  |                                                                   | 48  |     |     |     | 30  | 138 | 50  |     | <28 | 132 |     |
| <b>PDGF- AAAB</b>              |                                                                   |     |     |     |     | <24 | 126 | <20 | 132 |     | 132 |     |
| <b>RANTES</b>                  | <60                                                               | <24 | <30 | <60 |     | <24 | 156 | <20 | 60  | 40  | <24 | 80  |
| <b>sCD40L</b>                  | <60                                                               |     |     |     |     |     | 142 | <20 | <24 | 40  | 132 |     |
| <b>sIL2Ra</b>                  |                                                                   |     |     |     |     |     | 156 |     |     |     | 138 |     |
| <b>TGF<math>\alpha</math></b>  | <60                                                               |     | <30 |     |     |     | 156 |     |     |     |     |     |
| <b>TNF</b>                     | <60                                                               |     | <30 | 138 | <24 |     |     |     |     |     | 126 | <20 |
| <b>TNF <math>\beta</math></b>  |                                                                   |     |     |     |     |     |     | 50  |     |     |     |     |
| <b>VEGF</b>                    | 72                                                                |     |     | 144 |     | 30  |     |     |     |     |     |     |

For definition of a 'peak' please refer to the Materials and Methods section. The symbol '<' indicates that the first sample taken had the highest concentration of cytokine, and may therefore reflect the downstroke of an earlier peak. The 'true' peak is likely to occur on or before this time. Where no peak was apparent the entry is left blank.

**Supplementary Table 4: Mean Arterio-Jugular (AJ) Difference**

| Cytokine       | Mean AJ Difference (pg/ml) |                   |                   |                   |                   |                   |
|----------------|----------------------------|-------------------|-------------------|-------------------|-------------------|-------------------|
|                | Post-injury Day 2          | Post-injury Day 3 | Post-injury Day 4 | Post-injury Day 5 | Post-injury Day 6 | Post-injury Day 7 |
| EGF            | 1.875141                   | -0.23252          | -0.95891          | 3.84015           | -4.47453          | -4.65995          |
| Eotaxin        | 1.603117                   | 2.136182          | -3.01845          | -1.45033          | -0.29368          | 1.619965          |
| FGF2           | -3.81173                   | 2.927065          | 4.092492          | 0.952679          | 1.279743          | 10.33952          |
| Flt3 lig       |                            |                   | 4.646429          | -15.1572          | 21.25088          |                   |
| Fractalkine    | -8.29544                   | 21.32357          | 19.84808          | 1.636581          | 9.232561          | -143.593          |
| G-CSF          | 17.35724                   | 15.13912          | -81.2502          | -56.0841          | -5.62361          | 41.16102          |
| GM-CSF         | 25.8641                    | -0.59097          | 21.89753          | -15.8341          | -28.0875          | -3.25435          |
| GRO            | 54.35266                   | 39.96827          | -31.5682          | -43.4861          | 30.21222          | 14.07079          |
| IFN $\alpha$ 2 | -20.0295                   | 15.52018          | 21.17979          | -1.42106          | -15.7466          | -153.81           |
| IFN $\gamma$   | -5.69468                   | 2.840948          | 5.436678          | 3.232216          | -1.20917          | -2.47647          |
| IL1 $\alpha$   | -29.0093                   | 19.12729          | 15.62757          | 21.36284          | 13.28514          | -14.3645          |
| IL1 $\beta$    | 1.532934                   | 0.286592          | 0.636638          | -0.53883          | -0.14313          |                   |
| IL1ra          | -0.31201                   | 4.516077          | 28.32607          | 3.513606          | 9.683155          | 3.381515          |
| IL2            | -2.99707                   | -0.24641          | 3.137436          | 1.815665          | 0.383141          | 0.156431          |
| IL3            | 0.329574                   | 1.097421          | 0.898467          | 0.012675          | 0.713488          | -0.1213           |
| IL4            | -19.9944                   | 42.47096          | 23.01108          | -55.1626          |                   |                   |
| IL5            | -0.04789                   | 1.046874          | 0.594313          | -1.15427          | 0.520716          |                   |
| IL6            | -4.35382                   | 82.96537          | -1.93854          | -8.22118          | 14.74944          | -2.29607          |
| IL7            | -11.1971                   | -29.6719          | -7.92666          | -4.52652          | 0.396277          |                   |
| IL8            | 2.620368                   | -4.31435          | -2.72191          | -2.23151          | -2.13403          | -2.99019          |
| IL9            | -3.44582                   | 0.150914          | -0.92133          | -8.7895           | -0.3535           |                   |
| IL10           | -1.78515                   | -1.28865          | 1.570428          | 2.047966          | -1.20761          | 4.678682          |
| IL12p40        | 7.89176                    | 2.930595          | 1.007224          | -4.68024          | -2.97958          |                   |
| IL12p70        | 0.458103                   | 0.428805          | -0.12325          | 0.353194          | 9.529072          | -0.03069          |
| IL13           | 0.069866                   | 5.612306          | -0.97719          | -1.61861          | -0.07204          |                   |
| IL15           | 0.273691                   | 0.802119          | 1.104679          | -0.27227          | 0.303366          | -3.59581          |
| IL17           | -0.94552                   | -0.98045          | 2.786743          | 2.283847          | -0.13902          | -4.46986          |
| IP10           | 28.43872                   | 30.39634          | 74.00711          | -11.3218          | 11.86702          | 4.856976          |
| MCP1           | -82.8728                   | -12.2543          | -90.7948          | -27.4566          | 7.44504           | 4.417557          |
| MCP3           | -1.28728                   | 2.436847          | -0.60862          | -1.09926          | 0.378929          | 0.25002           |
| MDC            | 35.68933                   | 104.1084          | 76.33614          | -22.1188          | 15.70059          | -39.4056          |
| MIP1 $\alpha$  | 1.194599                   | 1.131667          | 5.755247          | 5.008562          | 1.313067          | -2.83107          |
| MIP1 $\beta$   | 0.659943                   | 8.123797          | 4.366846          | 3.14231           | 3.754314          | -0.93431          |
| PDGF-AA        | -231.634                   | 354.5443          | -625.408          | -170.341          | 301.179           | 25.41548          |
| PDGF-AAAB      | 61.03182                   | 494.5334          | -1071.12          | -319.602          | 492.5231          | 14.22242          |
| RANTES         | 163.4358                   | 89.23407          | 9.488974          | 89.76546          | 281.2552          | 162.4651          |
| sCD40L         | 23.35076                   | 95.10656          | -459.68           | -32.2113          | 67.51848          | 37.09804          |
| sIL2R          | 18.42131                   | 62.07483          | 26.69246          | 36.09919          | 41.82224          |                   |
| TGF $\alpha$   | 4.955435                   | 4.059651          | 1.766392          | -0.46947          | 1.033211          | 1.36363           |
| TNF $\alpha$   | -0.0835                    | 0.569497          | 1.21655           | -0.29566          | 0.774831          | 1.600922          |
| TNF $\beta$    | -0.88369                   | 4.942679          | 10.17798          | -3.73204          | -3.19672          |                   |
| VEGF           | 32.38924                   | 15.32384          | 28.60341          | -27.3167          | -37.453           |                   |

The AJ difference (Arterial minus Jugular Venous) was calculated for each pair of plasma samples. The mean of these across all 12 patients is calculated for samples taken on the same day post-injury. As no samples were taken in the first day post-injury, there are no values for day 1. The values that reached statistical significance using a Wilcoxon Signed Rank Test (Arterial – Jugular) are coloured in red. A p-value of 0.008 (~0.05/6) has been used for statistical significance as for each cytokine there are 6 comparisons (each cytokine's data is split into 6 days, day 2 to day 7).
